# Supplementary material for: Different Families of Retrotransposons and DNA Transposons Are Actively Transcribed and May Have Transposed Recently in Physcomitrium (Physcomitrella) patens
Source: Front Plant Sci. 2020 Aug 19;11:1274. doi: 10.3389/fpls.2020.01274 (PMC7466625; doi:10.3389/fpls.2020.01274)
Supplement: Supplementary file 2 [file Table_1.xlsx]

## Sheet: Samples_and_quantification
	Name_sample	SRA	PpTc2	PpTc1	LINE-1	LINE-2	RLX5	RLC5_reverse_transcriptase	RLC4	RLG1	RLG2
Gametophores_BCD_control_rep1	SYYS	SRX712744	0.0204172	72.092	0.0471279	4.19909	0.416601	0	4.27172	0.318154	81.0906
Gametophores_BCD_control_rep2	SYZC	SRX712739	0.0536486	61.7694	0.0464377	3.7978	0.659608	0	3.05371	0.817812	67.5283
Gametophores_BCD_control_rep3	SYZZ	SRX712754	0.327652	77.3032	0.0472688	4.55754	0.521416	0	4.96498	0.693707	119.205
Gametophores_drought_rep1	THUY	SRX712856	5.79943	54.0197	0.0814264	0.43811	0.20671	0	0.807522	1.2667	23.0044
Gametophores_drought_rep2	THXA	SRX712865	4.06175	39.1234	0.0283248	0.554735	0.205445	0	0.679604	1.01844	32.2404
Gametophores_drought_rep3	THWH	SRX712884	6.06648	58.3045	0	0.549002	0.516685	0	0.92603	0.700943	24.8373
Gametophores_hydroponic_auxin_rep1	UBZT	SRX713928	0.0897869	5.95553	0.0259062	0.379132	0.187903	0	0.953081	0.608311	0.0680884
Gametophores_hydroponic_auxin_rep2	UBZP	SRX713945	0.0948209	40.8114	0.0729566	1.81745	0.115755	0	2.93203	3.14249	0.376123
Gametophores_hydroponic_auxin_rep3	UBZA	SRX713938	0	5.50567	0.0379397	0.636891	0.103194	0	0.793979	1.37528	0.0805393
Gametophores_hydroponic_rep1	UBXZ	SRX713921	0.080508	44.1	0.092916	2.46465	0.315908	0.123019	1.31594	0.634081	0.624608
Gametophores_hydroponic_rep2	UBYX	SRX713947	0.15193	24.3118	0.0219182	0.669838	0.158976	0	1.58935	2.93359	0.230427
Gametophores_hydroponic_rep3	UBYG	SRX713922	0.305781	42.5929	0.0126039	4.20992	0.182836	0	1.88165	3.69944	0.428094
Gametophores_knopp_control_rep1	SYZW	SRX712755	0.0630894	49.9606	0.0364064	2.54386	0.34108	0	1.5432	0.58416	0.912693
Gametophores_knopp_control_rep2	SYYT	SRX712749	0.319101	54.4726	0.0613802	3.46765	0.667802	0	1.89816	0.599034	0.998963
Gametophores_knopp_control_rep3	SYYP	SRX712748	0.203284	52.9985	0.0293268	3.45457	0.514055	0	1.84511	0.32136	2.34793
Gametophores_rehydratation_rep1	THUN	SRX712855	5.79034	38.1775	0.0266245	0.547221	0.362086	0.141002	1.05403	1.29724	28.8733
Gametophores_rehydratation_rep2	THWN	SRX712857	8.22214	54.0502	0.101672	0.371985	0.460901	0	1.68953	1.16385	34.0191
Gametophores_rehydratation_rep3	THWS	SRX712859	5.48282	34.2838	0.0329575	0.496512	0.229086	0.0581804	0.995768	1.04474	23.9429
Germinating_spores_rep1	THWT	SRX712878	0.0279558	2.92052	0.0322644	3.06225	1.72589	0.128153	0.731121	2.76527	0.189168
Germinating_spores_rep2	THUW	SRX712862	0.162065	6.80813	0.0467606	17.5813	0.720721	0.0619104	2.70512	1.28328	0.415966
Germinating_spores_rep3	THWX	SRX712863	0.00927019	2.48005	0.0160484	3.79928	0.659611	0.0283305	0.738731	1.8465	0.0584022
Leaflets_rep1	THWW	SRX712864	0.203123	58.7202	0.0390715	5.56667	0.0531361	0	0.328108	0.0229362	0.118489
Leaflets_rep2	THUZ	SRX712877	0.17034	97.2932	0.0819136	7.65109	0.326774	0	0.515364	0.0192344	0.129174
protonemata_ABA_rep1	THWY	SRX712867	28.7923	33.6809	0.0266585	4.28007	0.241698	0.0352954	0.96654	15.2268	75.5251
protonemata_ABA_rep2	THUT	SRX712868	23.5842	38.8008	0.0246997	4.3696	0.447879	0.0981063	1.36962	20.7706	76.0631
protonemata_ABA_rep3	THWO	SRX712858	26.7797	36.0023	0.0405604	4.55088	0.471933	0.0716019	1.08131	21.6991	65.2905
protonemata_BCDA_continuous_light_rep1	SYZS	SRX712747	0.139465	68.4547	0	7.19382	1.33772	0	2.34576	239.968	33.6156
protonemata_BCDA_continuous_light_rep2	SYZU	SRX712763	0.254819	38.6095	0.0518986	4.86245	0.431326	0	1.49426	120.788	21.6286
protonemata_BCDA_continuous_light_rep3	SYZP	SRX712750	0.0412979	36.6606	0.0357471	4.21085	0.993907	0.0315524	0.991106	158.735	18.1353
protonemata_BCD_rep1	SYYU	SRX712736	0.0875759	25.6317	0.0505366	6.75694	1.20275	0.267639	3.70497	21.6195	37.3311
protonemata_BCD_rep2	SYZX	SRX712756	0.0743492	29.3975	0.085808	7.30692	1.01137	0.151478	3.86599	26.4117	38.111
protonemata_continuous_light_glucose_rep1	SYYG	SRX712737	0.0268321	36.6335	0.0154838	4.15881	0.673839	0.0410006	0.222903	40.3663	1.12695
protonemata_continuous_light_glucose_rep2	SYYX	SRX712743	0.801618	35.5155	0.38252	5.00842	1.54048	0.518229	0.687749	31.761	0.647461
protonemata_continuous_light_glucose_rep3	SYZA	SRX712753	0	29.5735	0	3.56397	0.975483	0	0.723316	51.7822	0.0315252
protonemata_heat_stress_rep1	THXC	SRX712882	0.0828445	57.2858	0.107564	3.69109	1.18653	0.158237	0.181613	74.9374	40.212
protonemata_heat_stress_rep2	THWP	SRX712881	0.0832943	71.2249	0.0480659	3.57924	0.53384	0.127277	0.179395	74.5013	43.4914
protonemata_heat_stress_rep3	THWC	SRX712879	0	60.0211	0.0767281	3.32466	0.695653	0.180599	0.12273	74.9095	39.4464
protonemata_liquid_ammonium_rep1	UBZH	SRX713924	0.114152	117.025	0	10.3823	0.129401	0.0581432	2.32392	0.438254	0.0355141
protonemata_liquid_ammonium_rep2	UBYA	SRX713933	0.0479819	114.11	0.0415327	10.1959	0.100415	0	0.664335	0.463239	0.100762
protonemata_liquid_ammonium_rep3	UBZY	SRX713927	0.0358808	85.9563	0.0207054	11.4969	0.272201	0	1.0819	0.571273	0.0167444
protonemata_liquid_control_ammonium_rep1	UBXX	SRX713907	0	94.0332	0.0395128	10.7786	0.179121	0	1.42206	0.78284	0
protonemata_liquid_control_ammonium_rep2	UBYC	SRX713936	0.069512	101.205	0.0401127	11.3005	0.345496	0	0.513297	0.671101	0.0162195
protonemata_liquid_control_ammonium_rep3	UBYT	SRX713943	0.047143	103.086	0.0906812	13.31	0.164432	0	5.58439	0.649439	0.282334
protonemata_liquid_rep1	SYYW	SRX712760	0.0110613	42.2363	0.0255322	13.5946	0.150467	0	1.61318	1.0192	0.154859
protonemata_liquid_rep2	SYYC	SRX712765	0	37.1694	0.0953895	13.6644	0.345938	0	1.26133	0.722356	0.0539987
protonemata_liquid_rep3	SYYZ	SRX712758	0.0137011	45.0305	0.0316255	14.5928	0.186376	0	0.956929	2.33457	0.0127877
protonemata_OPDA_rep1	UBYZ	SRX713937	0.0220081	9.3548	0.0254	1.33383	0.443305	0	0.301328	3.02312	20.5075
protonemata_OPDA_rep2	UBXN	SRX713935	0.132822	12.2082	0.021899	1.79095	0.277965	0	0.373637	2.78319	26.7149
protonemata_OPDA_rep3	UBZX	SRX713942	0	9.41689	0.0319192	1.31209	0.231516	0	0.263791	3.04486	20.3083
protonemata_UV-B_glucose_rep1	UBXS	SRX713920	0.0406038	24.6655	0.0234308	1.70444	0.701035	0.0310221	0.165531	1.2276	0.142113
protonemata_UV-B_glucose_rep2	UBYU	SRX713919	0.0378443	29.4948	0	1.64501	0.296997	0.0578277	0.26781	1.57044	0.0618124
protonemata_UV-B_glucose_rep3	UCAA	SRX713911	0	17.2969	0	1.5636	0.357988	0	0.210527	1.03532	0
Protoplasts_rep1	THXG	SRX712880	0.0232712	41.6506	0.188004	5.3583	0.803567	0.106678	1.80433	11.809	17.9025
Protoplasts_rep2	THWA	SRX712874	0.121549	36.1458	0.151972	5.53503	0.529942	0.123821	1.84496	10.6849	17.3571
Protoplasts_rep3	THUX	SRX712876	0.129783	41.423	0.171183	5.07492	0.824513	0.0849914	2.06502	11.3742	16.7831
Sporophytes_brown_rep1	THWZ	SRX712873	0	5.70109	0	3.35892	0.899374	0.350231	0.096966	0.25234	0.534806
Sporophytes_brown_rep2	THXB	SRX712883	0.203986	3.38258	0	6.13076	0.480256	0.0974059	0.105911	0.21594	0.249883
Sporophytes_brown_rep3	THUZ	SRX712877	0.0988828	5.59689	0.0114123	4.32769	1.014	0.483511	0.127781	0.21103	0.108441
Sporophytes_green_rep1	THUP	SRX712866	0.18808	10.4257	0.0310096	6.48693	1.54631	0.0821125	0.103336	0.919281	0.225696
Sporophytes_green_rep2	THWB	SRX712870	0.0407307	4.12752	0	10.7038	1.83265	0.414921	0.146206	0.676085	0.180573
Sporophytes_green_rep3	THWG	SRX712871	0.0876325	7.26578	0.0101139	7.50301	2.27409	0.348156	0.183346	0.418569	0.173804

## Sheet: Assembled_transcripts
>TRINITY_DN180_c0_g2_i2_Pp_Tc2
ATCCAGTCATGGATATGGATATTATGATGTACAGTGGGGTACAGAAATAATTCGAATTTTTTTCTAGAGCACCACTTTTGCTAAAAAAATCTTGTTGTTCAATTGAATGTTGTGATCATGTTGGAAGGAATTTTTCCCCGACACTTGGCCATCTATTTTTGGAGTGCAAGAGGTGTCTAATTGCATGTAATTAGCCATGTGTCTTCAAAAGCAGATTGCAAATGTGATGATTAATGTGGAAGTGGTTAGGTGAGCTAAAAAATCACAGTTGCAATTAGGCATGCATGCAGCCAGCAAAATGGAGTGATAGCATAGAATGCTTGGATGGGGTGACTTATATAATCCATCTGAAGATGTGAAGCACATTGCACTGCCACAGATTGAGATTGTGAAGCACAT…
>TRINITY_DN66_c0_g1_i4_Pp_Tc1
TTCTTTTTCTACGAAGGAATAGTTGGTTGACTCTGTTAGTATATGTATATATATATATATACAGTGACAAACAAAACCGAGTACAAAATCTGAACACTCATAGTTCATTGATCCTTCCAACTAACACATAAGTCAATTGATAGAATTACTTTTTTATTGTGTGTATTCATCCAGTCTTCTAAATGGATGAAAAATCTCATTATCATTTGAAGTAGTGTTTGTGAGAAAAGTGTTGTAGAAGCACACAGACGTGCGTACTCAGTTTTGGTTGCTTCTTCTTGTTGAATTTCGAAATTTCAATGTACACTCCTTGTTGCAAGATTTGAGGGCATTTTTTGTTTGTTGTGTTGCTCTTGTTGTGTACTATCTATAGTGAAAGTTGATTTGTCAATTGTATCT…
>TRINITY_DN90_c0_g1_i9_LINE-2
ACAAGGATCCGAATCACAGGAATTCAGGGATGCGCCCAAGGATAACCTGCACACCCTCAAGAATCCCAAGGACCGCCAACCGGAGAGACTTCTCCAGTCACAAGAAGCGGCCCGGACAACCGGAACGCCAGCATACTGGACAAGCACACGCACACAGGTAACTGCGGAAACCCCTCTTCATCTAACTGCTTCACAGGAGGACGCAGAATGTCGTACACCGGACCAGGACAACCGGTCTACAGGGATACAATATTACTCGCAAACGGGATGTACAATATCCCACCTGAGCAAGGAGGAGGGAGAACTTTTGGAACCCCAAGGAGATTCAGACCTAGAAATATTCCAGGCTATTAGGAACCAAGTACAGAATCGAAGGCGAACTGGACAACAACTCTTAAG…
>TRINITY_DN242_c0_g1_i7_LINE-1
ACAAGGATCCGAATCACAGGAATTCAGGGATGCGCCCAAGGATAACCTGCACACCCTCAAGAATCCCAAGGACCGCCAACCGGAGAGACTTCTCCAGTCACAAGAAGCGGCCCGGACAACCGGAACGCCAGCATACTGGACAAGCACACGCACACAGGTAACTGCGGAAACCCCTCTTCATCTAACTGCTTCACAGGAGGACGCAGAATGTCGTACACCGGACCAGGACAACCGGTCTACAGGGATACAATATTACTCGCAAACGGGATGTACAATATCCCACCTGAGCAAGGAGGAGGGAGAACTTTTGGAACCCCAAGGAGATTCAGACCTAGAAATATTCCAGGCTATTAGGAACCAAGTACAGAATCGAAGGCGAACTGGACAACAACTCTTAAG…
>TRINITY_DN88_c0_g1_TRINITY_DN30_c0_g1_RLC4
TATATATATATATATATATATATTTTAGTTTTTTCAAGTTCAAGTTTATCATTTTATTTGACTTTATATTTTAAGGTACGTTTTACTCAACTTTTCTACTTGATCTTGTATTTTCTTTACAGATTTATTTATAATGAGTGCTTCAACATCTTCAACTGCTTCTACCATGGTTCCTACTATTACCAGTGCATCCCAACATTTTCAAGCTCTTTTATTTCTACCATTGACTGTGGATGAAAATAATTATCTATTATGGGCAAAAATCTCAAAAGCAAATTTATTTGTAGAACAACTCTCAGATGCCATTATGTTTGAAGAATCTCCTACAACAAGTATTTCTATATCTCCTGCTATTCGTTGGAAAGCACTTCTTCTCCTTCGTTGTCATCTTGTACCCGC…
>TRINITY_DN100_c0_g1_i7_RLG1
GTCACGGACATACATATAATTACCTATATGAATAGATAAAAGTATGTAAAAGTAGATAAAAGTAGGTTAATTGTGTAATATCTTCTAGAGAAGCTTCTTAGAAGCTTCATAGACGCTGCTTTGACTTTATAGGAGTCTATAGTTGACTTTTAGGTTAGAAACTTGGTCAACAAGTTAGCCATGTGCCACACATGTTGGAAGCTTAAAGAACAAGCTAACTACGTGGTCCATCCATAGAAAACTTGCCTTGCAAGCAAAGGCATGTGGCCTAGAAAGTCAACATATATTGGAGGTCTTATAGAACATCGCCACGTGGCTTCTAGTTAGATAGTATATATAGAGGCAAGAGTGAAGCCCTCTTCACTCTTGTCAACTCCTTTCTTGCTTCTAGTCTAGTTT…
>TRINITY_DN38_c0_g1_i1_RLG2
TTTTTAAATTGATAATTAATAATCTAGCCTACCCTCAGGTGGGTAGGGAACGCAAACCACCAAGATAGTATTTACGGGCGATGACATGGAATTCACCAAGACAAACCAGCCCGCTAGTCCAATCTTGGCATACGGTACAACCTATGTTGTGGGGCTTACCCGGTCAGTAAACGAGACACTGTGATTCTGCCTTTGCGGCCAGAACCCCCCTCGTTCTCAATTCAGCTCACTGCCGAGGTATTATCCACTAACAAGGCAACGACAACGACGAATTACAATCCTAAGTTAACATAGATCATTCAATGTATGATCGCTTACCTCATGCAATTCCAGCTTCCTGCACAATTAGTATACCACTGGCCTCTCGATCACATGCTAAGGTTTCTAGCACAAACTACC…
>TRINITY_DN196_c0_g1_i5_RLX5
TCAGTATTCGAAGTAGTTATCCAGTCGCTACTGTTGAGAATAGAACTCTTTAAGTAGTTGCTAATGGTCATTAGAGTACAAGTGTTGTTAAGGATATCCCATAAGGTAGGGTGCTGGTCTATAGTACATTAGAGTACAAGGGGAGGGCTGGTCCTAGGAGATATTCCATATGGATTGTAGCTTTTGGTACCTTGGTACCAGTATATAAGGAAAGGGTTGGCATGGGAAGAATTATCTCATACCACACTCTATTTGTTATAGTGCAACCTTGCTGGTCCTAACTTACTTGTGTGGAGTATGTTTTCTATGTTTCAATAGGTTATGGGCCCACATTCTCTTACCAAGTAAGTTGTTCTTGCATTTTATTTTCTTTGTTGCTTGTTTGGTGGTTGAGATCTT…
>TRINITY_DN309_c0_g1_i1_RLC5_Reverse_transcriptase
GTAAGTGAAGATCAGGCCAATGTTGCTCTTCTTGATGATCCATTGACTTTGTGTGATGCAATGAGGTGTGGTGATGCAATGAAGTGGGAGATTGCTATGCAAGAAGAGTACAAATCTCTTATGGACAACAAGACATGGGAGTTGACTCCACTTCCACCAAATCGTTCAGCAATTGGATGTAAGTGGGTGTTTAGAACCAAGAGAGATGCTATGGGCAATGTTGTGAGGTACAAAGCAAGATTGGTTGCCAAAGGCTACTCACAAATTACTGGAGTGGATTTTAATGAGACATTTGCTCCAGTGGCCAAATTCACTACCATTAGAACTATAGTAGCAATTGGAGCATCAATAGACTTGGAGATGCATCAAATGGACGTCAAGACAGCCTTCTTGAATGGA…
