# Supplementary material for: Different Families of Retrotransposons and DNA Transposons Are Actively Transcribed and May Have Transposed Recently in Physcomitrium (Physcomitrella) patens
Source: Front Plant Sci. 2020 Aug 19;11:1274. doi: 10.3389/fpls.2020.01274 (PMC7466625; doi:10.3389/fpls.2020.01274)
Supplement: Supplementary file 3 [file Table_2.xlsx]

## Sheet: Sheet1
>Tc3-like_fw
TCGGGTGTTATGTCATGCTG
>Tc3-like_rev
GACGATTCATCCGTCCAAAT
>Mariner1 fw
AGTAGTTCATCTGAGGAGGGAGATT
>Mariner1 rev
AGGTGATGTCTGAGAAGTGTTTACC
>RLC5_ fw
AGATGTGTCCAAGTGGGAGTAGTG
>RLC5_ rev
GGCAACTTCCTCTCCTTCTTCAC
>RLC4 fw
GGGAGACCAATATCCATACCTCAC
>RLC4 rev
GGAGAGCTTTGGTGAAGAGATCAG
>Line-1 fw
GTACACACACGGTACCCTAGCAT
>Line-1 rev
GGAGCCTTGTAGTCGTGTATACCT
>Line-2 fw
CTCGAACTCTAGCAGAGGGTTATC
>Line-2 rev
TGACTGTAGACTACTGGCCATCTC
>RLG2 fw
CCTCCTCGGATAGAGTCTGATAAC
>RLG2 rev
AGGTCCTCTATCTCTTCCATAGCC
>oCV5/RLG1fw
TTGCTGTGAAGTGCGACAAT
>oCV6/RLG1rev
CAAGCTGAGGCTCCTGAATC
>Line-1 fw
>APTfw
CGAGATGTGACGACGTTGCTGTTG
>APTrev
CGCATTGGCACAAACTTCGCACC
