# Supplementary material for: Different Families of Retrotransposons and DNA Transposons Are Actively Transcribed and May Have Transposed Recently in Physcomitrium (Physcomitrella) patens
Source: Front Plant Sci. 2020 Aug 19;11:1274. doi: 10.3389/fpls.2020.01274 (PMC7466625; doi:10.3389/fpls.2020.01274)
Supplement: Supplementary file 4 [file Table_3.xlsx]

## Sheet: Hoja1
Chromosome	Start	End	Accession	Transposon Family	Order	Read Support (F=Forward, R= reverse,FR=Forward and reverse)	Zygosity
Chr01	125293	125793	Villersexel	RLG1	LTR	F	0.978
Chr01	2709789	2710289	Villersexel	RLG1	LTR	FR	1000
Chr01	5847051	5847551	Kaskaskia	RLG1	LTR	R	1000
Chr01	6361379	6361879	Villersexel	RLG1	LTR	FR	1000
Chr01	7208605	7209105	Villersexel	RLG1	LTR	FR	1000
Chr01	8340745	8341245	Kaskaskia	RLG1	LTR	R	1000
Chr01	8401700	8402200	Villersexel	RLG1	LTR	FR	0.994
Chr01	9578277	9578777	Kaskaskia	RLG1	LTR	F	1000
Chr01	11802013	11802513	Villersexel	RLG1	LTR	R	1000
Chr01	12910321	12910821	Villersexel	RLG1	LTR	R	0.993
Chr01	13887478	13887978	Villersexel	RLG3	LTR	R	0.980
Chr01	16277904	16278404	Villersexel	RLG1	LTR	F	1000
Chr01	18217892	18218392	Villersexel	RLG1	LTR	FR	0.982
Chr01	20103954	20104454	Villersexel	RLG1	LTR	R	0.980
Chr01	23487658	23488158	Kaskaskia	RLG1	LTR	FR	1000
Chr01	24261129	24261629	Villersexel	RLG1	LTR	FR	0.999
Chr01	24743197	24743697	Kaskaskia	RLG1	LTR	FR	1000
Chr01	25653670	25654170	Villersexel	RLG1	LTR	F	1000
Chr01	26161879	26162379	Villersexel	RLG1	LTR	FR	0.971
Chr01	30196380	30196880	Villersexel	RLG1	LTR	FR	0.913
Chr02	942128	942628	Kaskaskia	RLG1	LTR	R	1000
Chr02	1185244	1185744	Kaskaskia	RLG1	LTR	FR	1000
Chr02	1632869	1633369	Reute	RLG1	LTR	F	1000
Chr02	2124914	2125414	Kaskaskia	RLG1	LTR	F	1000
Chr02	3325717	3326217	Kaskaskia	RLC5	LTR	R	0.800
Chr02	3631922	3632422	Kaskaskia	RLG1	LTR	FR	1000
Chr02	4722697	4723197	Villersexel	RLG3	LTR	R	1000
Chr02	4943911	4944411	Kaskaskia	RLG1	LTR	FR	1000
Chr02	5410659	5411159	Kaskaskia	RLG1	LTR	R	1000
Chr02	5821081	5821581	Kaskaskia	RLG1	LTR	FR	1000
Chr02	6091962	6092462	Villersexel	RLG1	LTR	R	1000
Chr02	6130626	6131126	Kaskaskia	RLG1	LTR	FR	1000
Chr02	7181315	7181815	Villersexel	RLC5	LTR	FR	0.950
Chr02	7548398	7548898	Villersexel	RLC5	LTR	FR	0.997
Chr02	8849053	8849553	Villersexel	RLG1	LTR	FR	0.973
Chr02	14614691	14615191	Villersexel	RLG1	LTR	F	0.945
Chr02	14717610	14718110	Kaskaskia	RLG1	LTR	R	1000
Chr02	15336875	15337375	Villersexel	RLG1	LTR	FR	0.869
Chr02	15380256	15380756	Villersexel	RLC5	LTR	FR	0.976
Chr02	15515350	15515850	Villersexel	RLG1	LTR	R	1000
Chr02	15605358	15605858	Villersexel	RLG3	LTR	R	1000
Chr02	15964133	15964633	Villersexel	RLG1	LTR	F	1000
Chr02	16557174	16557674	Villersexel	RLG1	LTR	F	0.989
Chr02	16807832	16808332	Villersexel	RLG1	LTR	FR	1000
Chr02	17523395	17523895	Kaskaskia	RLG1	LTR	R	1000
Chr02	19198119	19198619	Kaskaskia	RLG1	LTR	F	1000
Chr02	19342543	19343043	Villersexel	RLG1	LTR	F	1000
Chr02	19624618	19625118	Villersexel	RLG1	LTR	FR	1000
Chr02	21595139	21595639	Kaskaskia	RLG1	LTR	FR	1000
Chr02	22355715	22356215	Kaskaskia	RLG1	LTR	R	1000
Chr02	22426270	22426770	Kaskaskia	RLG1	LTR	F	1000
Chr02	23416386	23416886	Villersexel	RLG1	LTR	FR	0.997
Chr02	23734033	23734533	Villersexel	RLG3	LTR	F	1000
Chr02	24021046	24021546	Villersexel	RLG1	LTR	FR	0.983
Chr02	24481467	24481967	Kaskaskia	RLG1	LTR	FR	1000
Chr02	25181403	25181903	Villersexel	RLG1	LTR	F	0.993
Chr02	25356371	25356871	Kaskaskia	RLG1	LTR	F	1000
Chr02	25608011	25608511	Villersexel	RLG1	LTR	F	0.998
Chr03	697657	698157	Kaskaskia	RLG1	LTR	R	1000
Chr03	697706	698206	Reute	RLG1	LTR	F	1000
Chr03	854869	855369	Kaskaskia	RLG1	LTR	R	1000
Chr03	2701830	2702330	Villersexel	RLG1	LTR	FR	1000
Chr03	3480652	3481152	Villersexel	RLG1	LTR	R	1000
Chr03	3511351	3511851	Villersexel	RLC5	LTR	R	0.991
Chr03	7493967	7494467	Villersexel	RLG1	LTR	FR	0.984
Chr03	7656695	7657195	Villersexel	RLG1	LTR	R	0.999
Chr03	7706023	7706523	Reute	RLC5	LTR	F	0.708
Chr03	8120428	8120928	Kaskaskia	RLG1	LTR	FR	1000
Chr03	9648317	9648817	Villersexel	RLG1	LTR	FR	0.897
Chr03	10139628	10140128	Kaskaskia	RLG1	LTR	FR	1000
Chr03	14169146	14169646	Villersexel	RLG1	LTR	FR	0.980
Chr03	15058361	15058861	Villersexel	RLG1	LTR	R	0.919
Chr03	16342993	16343493	Kaskaskia	RLG1	LTR	F	0.957
Chr03	17272227	17272727	Reute	RLG1	LTR	FR	1000
Chr03	18833673	18834173	Villersexel	RLG1	LTR	FR	0.998
Chr03	19940451	19940951	Villersexel	RLG1	LTR	F	1000
Chr03	20997628	20998128	Villersexel	RLG1	LTR	FR	0.997
Chr03	21994788	21995288	Villersexel	RLG1	LTR	F	0.999
Chr03	22281599	22282099	Villersexel	RLG1	LTR	FR	1000
Chr03	22339845	22340345	Villersexel	RLG1	LTR	FR	0.988
Chr03	23958274	23958774	Villersexel	RLG1	LTR	FR	0.950
Chr03	24703222	24703722	Villersexel	RLG1	LTR	FR	0.986
Chr04	1564439	1564939	Villersexel	RLG3	LTR	R	1000
Chr04	2106672	2107172	Villersexel	RLG1	LTR	F	0.972
Chr04	3092798	3093298	Villersexel	RLG1	LTR	FR	0.986
Chr04	3390379	3390879	Kaskaskia	RLG1	LTR	F	1000
Chr04	4370998	4371498	Kaskaskia	RLG1	LTR	FR	1000
Chr04	5947932	5948432	Villersexel	RLG3	LTR	F	1000
Chr04	6047749	6048249	Villersexel	RLG1	LTR	FR	0.876
Chr04	7988793	7989293	Kaskaskia	RLG1	LTR	FR	1000
Chr04	8781498	8781998	Kaskaskia	RLG1	LTR	FR	1000
Chr04	10110237	10110737	Villersexel	RLG1	LTR	F	1000
Chr04	10111126	10111626	Villersexel	RLG1	LTR	R	1000
Chr04	10383497	10383997	Kaskaskia	RLG1	LTR	R	0.973
Chr04	10465136	10465636	Villersexel	RLG1	LTR	R	0.968
Chr04	14966945	14967445	Villersexel	RLG1	LTR	F	1000
Chr04	15344711	15345211	Villersexel	RLG1	LTR	FR	0.977
Chr04	16620020	16620520	Villersexel	RLG1	LTR	FR	0.989
Chr04	16717892	16718392	Villersexel	RLG1	LTR	R	0.877
Chr04	16731366	16731866	Villersexel	RLG3	LTR	F	0.997
Chr04	17041541	17042041	Villersexel	RLG1	LTR	FR	0.960
Chr04	17640645	17641145	Reute	RLC5	LTR	FR	0.951
Chr04	17688741	17689241	Villersexel	RLG1	LTR	FR	0.985
Chr04	18316381	18316881	Villersexel	RLG1	LTR	FR	0.997
Chr04	18851289	18851789	Villersexel	RLG1	LTR	R	1000
Chr04	19827248	19827748	Kaskaskia	RLG1	LTR	F	1000
Chr04	20287327	20287827	Villersexel	RLG1	LTR	F	0.999
Chr04	20529060	20529560	Villersexel	RLG1	LTR	FR	0.971
Chr04	21383247	21383747	Villersexel	RLG1	LTR	F	0.900
Chr04	21384064	21384564	Kaskaskia	RLG1	LTR	F	1000
Chr05	379210	379710	Villersexel	RLG1	LTR	F	1000
Chr05	980800	981300	Villersexel	RLG1	LTR	FR	0.999
Chr05	2914292	2914792	Kaskaskia	RLG1	LTR	FR	1000
Chr05	3329091	3329591	Villersexel	RLG1	LTR	FR	1000
Chr05	6217648	6218148	Reute	RLG3	LTR	F	0.864
Chr05	7195227	7195727	Villersexel	RLG1	LTR	FR	0.994
Chr05	9721145	9721645	Villersexel	RLG3	LTR	R	1000
Chr05	12000329	12000829	Villersexel	RLG1	LTR	FR	0.904
Chr05	12119321	12119821	Villersexel	RLG1	LTR	FR	0.940
Chr05	13194125	13194625	Villersexel	RLG3	LTR	FR	0.826
Chr05	17478944	17479444	Villersexel	RLG1	LTR	FR	1000
Chr05	17816247	17816747	Villersexel	RLG1	LTR	FR	0.981
Chr05	17816251	17816751	Kaskaskia	RLG1	LTR	FR	1000
Chr05	18279647	18280147	Kaskaskia	RLG1	LTR	R	1000
Chr06	3580793	3581293	Villersexel	RLG1	LTR	FR	0.846
Chr06	3816334	3816834	Kaskaskia	RLG1	LTR	R	1000
Chr06	4368280	4368780	Kaskaskia	RLG1	LTR	FR	1000
Chr06	4835460	4835960	Reute	RLG1	LTR	F	1000
Chr06	8506153	8506653	Villersexel	RLG1	LTR	FR	0.982
Chr06	8507790	8508290	Kaskaskia	RLG1	LTR	F	1000
Chr06	8900859	8901359	Villersexel	RLG1	LTR	F	0.990
Chr06	8983440	8983940	Kaskaskia	RLG1	LTR	F	1000
Chr06	9253750	9254250	Villersexel	RLG1	LTR	FR	0.999
Chr06	11327144	11327644	Kaskaskia	RLG1	LTR	F	1000
Chr06	11741453	11741953	Kaskaskia	RLG1	LTR	FR	1000
Chr06	12383300	12383800	Kaskaskia	RLG1	LTR	FR	1000
Chr06	13189183	13189683	Villersexel	RLG1	LTR	FR	0.986
Chr06	15276734	15277234	Villersexel	RLG1	LTR	FR	0.999
Chr06	16712486	16712986	Villersexel	RLG1	LTR	FR	0.918
Chr06	16882955	16883455	Villersexel	RLG1	LTR	R	1000
Chr06	17630670	17631170	Villersexel	RLG1	LTR	FR	0.997
Chr07	701728	702228	Villersexel	RLG1	LTR	R	1000
Chr07	831854	832354	Kaskaskia	RLG1	LTR	FR	0.875
Chr07	1982348	1982848	Kaskaskia	RLG1	LTR	FR	1000
Chr07	3283342	3283842	Kaskaskia	RLG1	LTR	FR	1000
Chr07	3303857	3304357	Kaskaskia	RLG1	LTR	R	1000
Chr07	5163888	5164388	Kaskaskia	RLG1	LTR	R	1000
Chr07	5231709	5232209	Villersexel	RLG3	LTR	F	0.988
Chr07	5247858	5248358	Villersexel	RLG3	LTR	R	0.857
Chr07	5710694	5711194	Kaskaskia	RLG1	LTR	FR	1000
Chr07	5856500	5857000	Villersexel	RLG1	LTR	F	0.852
Chr07	5987635	5988135	Reute	RLC5	LTR	FR	0.991
Chr07	5987636	5988136	Villersexel	RLC5	LTR	FR	1000
Chr07	6176014	6176514	Villersexel	RLG3	LTR	R	1000
Chr07	6587578	6588078	Villersexel	RLG1	LTR	R	1000
Chr07	7140319	7140819	Kaskaskia	RLC5	LTR	FR	1000
Chr07	7574902	7575402	Villersexel	RLG3	LTR	R	1000
Chr07	8275535	8276035	Villersexel	RLG1	LTR	F	1000
Chr07	9269360	9269860	Kaskaskia	RLC5	LTR	F	1000
Chr07	9630615	9631115	Villersexel	RLG1	LTR	FR	1000
Chr07	11134682	11135182	Villersexel	RLG3	LTR	F	1000
Chr07	11159365	11159865	Villersexel	RLG3	LTR	R	1000
Chr07	11322554	11323054	Villersexel	RLG3	LTR	R	0.978
Chr07	12118926	12119426	Kaskaskia	RLG3	LTR	R	1000
Chr07	12265732	12266232	Villersexel	RLG1	LTR	FR	1000
Chr07	13111540	13112040	Villersexel	RLG3	LTR	R	1000
Chr07	13495325	13495825	Reute	RLG1	LTR	F	0.833
Chr07	13635600	13636100	Kaskaskia	RLG1	LTR	F	0.800
Chr07	14015159	14015659	Kaskaskia	RLG1	LTR	FR	1000
Chr07	14138285	14138785	Kaskaskia	RLC5	LTR	FR	1000
Chr07	14361430	14361930	Villersexel	RLG1	LTR	R	0.999
Chr07	15349053	15349553	Villersexel	RLG1	LTR	R	0.988
Chr07	16258178	16258678	Kaskaskia	RLG1	LTR	F	1000
Chr08	36050	36550	Kaskaskia	RLC5	LTR	F	1000
Chr08	324174	324674	Villersexel	RLG1	LTR	FR	1000
Chr08	855531	856031	Villersexel	RLG1	LTR	F	0.814
Chr08	1802182	1802682	Villersexel	RLG1	LTR	R	0.978
Chr08	2302286	2302786	Villersexel	RLG1	LTR	FR	0.996
Chr08	2795499	2795999	Villersexel	RLG1	LTR	R	0.986
Chr08	5363529	5364029	Villersexel	RLG1	LTR	FR	0.986
Chr08	5569882	5570382	Kaskaskia	RLC5	LTR	F	1000
Chr08	5735271	5735771	Villersexel	RLG3	LTR	R	1000
Chr08	6618948	6619448	Kaskaskia	RLG1	LTR	FR	1000
Chr08	7018215	7018715	Villersexel	RLG1	LTR	FR	0.990
Chr08	7163743	7164243	Kaskaskia	RLG1	LTR	FR	1000
Chr08	8364423	8364923	Villersexel	RLG1	LTR	FR	0.992
Chr08	9194849	9195349	Villersexel	RLG1	LTR	F	0.999
Chr08	9734927	9735427	Villersexel	RLG1	LTR	FR	0.997
Chr08	12236499	12236999	Villersexel	RLG1	LTR	FR	0.996
Chr08	14153971	14154471	Kaskaskia	RLG1	LTR	F	1000
Chr08	14657483	14657983	Villersexel	RLG1	LTR	FR	0.976
Chr08	14808552	14809052	Villersexel	RLG1	LTR	R	1000
Chr08	14856681	14857181	Villersexel	RLC5	LTR	FR	0.957
Chr08	15791077	15791577	Villersexel	RLG3	LTR	R	1000
Chr08	15791091	15791591	Kaskaskia	RLG3	LTR	R	1000
Chr08	16820250	16820750	Kaskaskia	RLG1	LTR	FR	1000
Chr08	17060210	17060710	Villersexel	RLG1	LTR	FR	1000
Chr09	3261715	3262215	Villersexel	RLG1	LTR	FR	0.717
Chr09	4019901	4020401	Villersexel	RLG1	LTR	FR	0.978
Chr09	10117624	10118124	Villersexel	RLG1	LTR	FR	0.999
Chr09	14596539	14597039	Villersexel	RLG1	LTR	R	1000
Chr09	15221460	15221960	Villersexel	RLG1	LTR	R	1000
Chr09	15793847	15794347	Villersexel	RLG3	LTR	F	1000
Chr10	1037902	1038402	Kaskaskia	RLG1	LTR	F	1000
Chr10	1403831	1404331	Villersexel	RLG1	LTR	FR	1000
Chr10	1572254	1572754	Villersexel	RLG1	LTR	F	0.995
Chr10	3778244	3778744	Villersexel	RLC5	LTR	FR	0.993
Chr10	4166202	4166702	Kaskaskia	RLG1	LTR	R	1000
Chr10	5182425	5182925	Villersexel	RLG1	LTR	F	0.998
Chr10	6919946	6920446	Villersexel	RLG1	LTR	F	0.764
Chr10	6990433	6990933	Kaskaskia	RLG1	LTR	R	1000
Chr10	7592782	7593282	Villersexel	RLG1	LTR	R	0.859
Chr10	8850120	8850620	Villersexel	RLG1	LTR	FR	0.883
Chr10	9814367	9814867	Villersexel	RLG1	LTR	FR	0.997
Chr10	11711218	11711718	Kaskaskia	RLG1	LTR	R	1000
Chr10	11768596	11769096	Kaskaskia	RLG1	LTR	FR	1000
Chr10	13835517	13836017	Villersexel	RLG1	LTR	F	0.972
Chr10	14639899	14640399	Kaskaskia	RLG1	LTR	F	1000
Chr10	14756552	14757052	Villersexel	RLG1	LTR	R	1000
Chr10	15069061	15069561	Villersexel	RLG1	LTR	R	0.988
Chr10	15084465	15084965	Villersexel	RLG1	LTR	F	0.895
Chr10	15101763	15102263	Kaskaskia	RLG1	LTR	FR	1000
Chr10	15625858	15626358	Kaskaskia	RLG1	LTR	R	1000
Chr10	16002670	16003170	Villersexel	RLG3	LTR	R	1000
Chr10	16877737	16878237	Kaskaskia	RLG1	LTR	F	1000
Chr11	1179003	1179503	Kaskaskia	RLG1	LTR	F	1000
Chr11	2298308	2298808	Reute	RLG3	LTR	F	0.958
Chr11	2362152	2362652	Kaskaskia	RLG3	LTR	R	1000
Chr11	4579947	4580447	Kaskaskia	RLG1	LTR	R	1000
Chr11	4580308	4580808	Kaskaskia	RLG1	LTR	F	1000
Chr11	4582097	4582597	Villersexel	RLG1	LTR	FR	0.997
Chr11	4731452	4731952	Villersexel	RLG3	LTR	R	0.750
Chr11	4731494	4731994	Kaskaskia	RLG3	LTR	F	1000
Chr11	4733880	4734380	Reute	RLG3	LTR	F	1000
Chr11	5069234	5069734	Villersexel	RLG3	LTR	F	0.999
Chr11	5431733	5432233	Villersexel	RLG1	LTR	F	0.917
Chr11	7104763	7105263	Reute	RLG1	LTR	FR	0.945
Chr11	7229861	7230361	Villersexel	RLG1	LTR	FR	0.993
Chr11	8839956	8840456	Kaskaskia	RLG1	LTR	R	1000
Chr11	9960457	9960957	Kaskaskia	RLC5	LTR	F	1000
Chr11	9983371	9983871	Villersexel	RLC5	LTR	FR	0.977
Chr11	10138551	10139051	Villersexel	RLG1	LTR	FR	0.953
Chr11	10397162	10397662	Reute	RLG3	LTR	R	0.915
Chr11	11232822	11233322	Villersexel	RLG3	LTR	FR	0.851
Chr11	12349818	12350318	Villersexel	RLG1	LTR	FR	0.985
Chr11	13931628	13932128	Kaskaskia	RLC5	LTR	FR	1000
Chr11	15025470	15025970	Kaskaskia	RLG1	LTR	F	0.889
Chr11	17442272	17442772	Villersexel	RLG1	LTR	F	0.932
Chr12	434906	435406	Villersexel	RLG3	LTR	FR	0.977
Chr12	871358	871858	Kaskaskia	RLG3	LTR	R	1000
Chr12	1791189	1791689	Villersexel	RLG1	LTR	FR	1000
Chr12	4433926	4434426	Kaskaskia	RLG3	LTR	F	1000
Chr12	4945126	4945626	Villersexel	RLG1	LTR	FR	0.989
Chr12	5047251	5047751	Villersexel	RLG1	LTR	R	0.810
Chr12	7758542	7759042	Kaskaskia	RLG1	LTR	F	1000
Chr12	10881008	10881508	Villersexel	RLG1	LTR	FR	0.985
Chr12	13098746	13099246	Villersexel	RLG1	LTR	FR	0.967
Chr12	13463306	13463806	Villersexel	RLG1	LTR	F	0.982
Chr12	14919045	14919545	Reute	RLG1	LTR	F	0.750
Chr12	15605641	15606141	Kaskaskia	RLG1	LTR	FR	1000
Chr12	16260712	16261212	Kaskaskia	RLG1	LTR	FR	1000
Chr13	1880517	1881017	Villersexel	RLG1	LTR	R	1000
Chr13	3201839	3202339	Kaskaskia	RLG1	LTR	R	1000
Chr13	4783093	4783593	Kaskaskia	RLG1	LTR	FR	1000
Chr13	5269657	5270157	Kaskaskia	RLG3	LTR	R	1000
Chr13	5436794	5437294	Kaskaskia	RLG1	LTR	FR	1000
Chr13	5844889	5845389	Villersexel	RLG3	LTR	FR	0.886
Chr13	9696491	9696991	Villersexel	RLG3	LTR	R	1000
Chr13	9735810	9736310	Kaskaskia	RLG1	LTR	R	1000
Chr13	10334956	10335456	Villersexel	RLG1	LTR	FR	0.995
Chr13	10596838	10597338	Kaskaskia	RLC5	LTR	FR	1000
Chr13	12628956	12629456	Villersexel	RLG1	LTR	FR	0.938
Chr13	12755891	12756391	Villersexel	RLG1	LTR	FR	1000
Chr13	12833825	12834325	Kaskaskia	RLG1	LTR	F	1000
Chr13	13115860	13116360	Kaskaskia	RLG1	LTR	FR	1000
Chr13	15410227	15410727	Villersexel	RLG1	LTR	R	0.950
Chr13	15729194	15729694	Villersexel	RLG1	LTR	FR	0.958
Chr13	16942500	16943000	Villersexel	RLG1	LTR	FR	1000
Chr14	25497	25997	Villersexel	RLG1	LTR	FR	0.908
Chr14	817897	818397	Villersexel	RLG1	LTR	FR	0.952
Chr14	844708	845208	Villersexel	RLG1	LTR	FR	0.994
Chr14	1149854	1150354	Villersexel	RLG1	LTR	F	1000
Chr14	1661147	1661647	Villersexel	RLC5	LTR	FR	1000
Chr14	3687508	3688008	Villersexel	RLG1	LTR	R	1000
Chr14	4611663	4612163	Kaskaskia	RLG1	LTR	FR	1000
Chr14	5568420	5568920	Kaskaskia	RLG1	LTR	FR	1000
Chr14	5601429	5601929	Reute	RLG1	LTR	R	0.792
Chr14	5754830	5755330	Kaskaskia	RLG1	LTR	R	1000
Chr14	5797944	5798444	Kaskaskia	RLG1	LTR	R	1000
Chr14	6189376	6189876	Kaskaskia	RLC5	LTR	FR	1000
Chr14	6189407	6189907	Villersexel	RLC5	LTR	FR	0.964
Chr14	11677444	11677944	Kaskaskia	RLG1	LTR	F	1000
Chr14	13121699	13122199	Villersexel	RLG3	LTR	F	1000
Chr14	14216307	14216807	Villersexel	RLG1	LTR	R	1000
Chr14	15083908	15084408	Villersexel	RLG1	LTR	R	0.728
Chr15	570867	571367	Villersexel	RLG1	LTR	FR	0.994
Chr15	2344718	2345218	Villersexel	RLG1	LTR	R	1000
Chr15	4762512	4763012	Villersexel	RLC5	LTR	FR	0.895
Chr15	4926611	4927111	Kaskaskia	RLG1	LTR	FR	1000
Chr15	6138422	6138922	Kaskaskia	RLG1	LTR	FR	1000
Chr15	8445228	8445728	Villersexel	RLG1	LTR	FR	1000
Chr15	9197806	9198306	Kaskaskia	RLG1	LTR	FR	1000
Chr15	9205751	9206251	Villersexel	RLG1	LTR	FR	1000
Chr15	10830808	10831308	Kaskaskia	RLG1	LTR	R	1000
Chr15	12085575	12086075	Kaskaskia	RLG1	LTR	F	1000
Chr15	12991098	12991598	Villersexel	RLG3	LTR	R	0.942
Chr15	13238426	13238926	Kaskaskia	RLC5	LTR	FR	1000
Chr15	14397619	14398119	Kaskaskia	RLG1	LTR	R	0.973
Chr15	15777871	15778371	Villersexel	RLG1	LTR	F	1000
Chr15	15783373	15783873	Villersexel	RLG2	LTR	F	1000
Chr15	15908931	15909431	Kaskaskia	RLG1	LTR	FR	1000
Chr15	16311578	16312078	Villersexel	RLC5	LTR	FR	0.967
Chr15	16443040	16443540	Villersexel	RLC5	LTR	F	1000
Chr15	16564012	16564512	Kaskaskia	RLG1	LTR	FR	1000
Chr15	16761898	16762398	Villersexel	RLG1	LTR	FR	1000
Chr15	16858204	16858704	Villersexel	RLC5	LTR	R	1000
Chr15	17004603	17005103	Villersexel	RLG3	LTR	FR	0.852
Chr16	2408628	2409128	Villersexel	RLG1	LTR	FR	1000
Chr16	3584094	3584594	Villersexel	RLG3	LTR	FR	0.835
Chr16	4008281	4008781	Villersexel	RLG1	LTR	FR	0.886
Chr16	7016183	7016683	Villersexel	RLG3	LTR	F	0.989
Chr16	7016517	7017017	Villersexel	RLC4	LTR	R	1000
Chr16	7413889	7414389	Kaskaskia	RLG1	LTR	FR	1000
Chr16	8159332	8159832	Kaskaskia	RLG1	LTR	R	1000
Chr16	8922380	8922880	Villersexel	RLG1	LTR	R	1000
Chr16	12873717	12874217	Villersexel	RLG1	LTR	FR	0.993
Chr16	13203240	13203740	Villersexel	RLG1	LTR	R	0.922
Chr16	13482382	13482882	Kaskaskia	RLG1	LTR	R	1000
Chr16	15378934	15379434	Kaskaskia	RLG1	LTR	FR	1000
Chr17	160157	160657	Villersexel	RLG1	LTR	FR	0.972
Chr17	369507	370007	Villersexel	RLG3	LTR	F	1000
Chr17	1556281	1556781	Kaskaskia	RLG1	LTR	FR	1000
Chr17	3098428	3098928	Reute	RLC5	LTR	FR	1000
Chr17	3296374	3296874	Kaskaskia	RLG1	LTR	R	1000
Chr17	3929745	3930245	Kaskaskia	RLG1	LTR	FR	1000
Chr17	5463511	5464011	Reute	RLG1	LTR	FR	1000
Chr17	5463537	5464037	Kaskaskia	RLG1	LTR	FR	1000
Chr17	5463559	5464059	Villersexel	RLG1	LTR	FR	0.960
Chr17	5979375	5979875	Villersexel	RLG3	LTR	FR	0.905
Chr17	6458445	6458945	Villersexel	PpTc1	DNA-transposon	R	1000
Chr17	6760488	6760988	Kaskaskia	RLG3	LTR	R	1000
Chr17	6950786	6951286	Kaskaskia	RLG3	LTR	FR	1000
Chr17	7138316	7138816	Kaskaskia	RLG1	LTR	F	0.933
Chr17	7149973	7150473	Kaskaskia	RLG1	LTR	F	1000
Chr17	7362745	7363245	Kaskaskia	RLG1	LTR	FR	1000
Chr17	7853257	7853757	Villersexel	RLG1	LTR	FR	0.941
Chr17	8145459	8145959	Kaskaskia	RLG1	LTR	F	0.893
Chr17	8432548	8433048	Villersexel	RLG1	LTR	FR	1000
Chr17	8609687	8610187	Villersexel	RLG1	LTR	R	1000
Chr17	11111090	11111590	Villersexel	RLC4	LTR	R	1000
Chr17	11564463	11564963	Villersexel	RLG1	LTR	FR	0.998
Chr17	12613108	12613608	Villersexel	RLG1	LTR	FR	0.989
Chr17	12723168	12723668	Kaskaskia	RLG1	LTR	FR	1000
Chr17	13033552	13034052	Villersexel	RLG1	LTR	FR	0.990
Chr17	15665694	15666194	Kaskaskia	RLG1	LTR	F	1000
Chr18	80772	81272	Kaskaskia	RLG1	LTR	F	1000
Chr18	438294	438794	Villersexel	RLG3	LTR	F	1000
Chr18	1522705	1523205	Villersexel	RLG1	LTR	F	0.885
Chr18	2013933	2014433	Kaskaskia	RLG1	LTR	F	1000
Chr18	7075643	7076143	Kaskaskia	RLG1	LTR	R	1000
Chr18	7606457	7606957	Villersexel	RLG1	LTR	FR	1000
Chr18	10113656	10114156	Villersexel	RLG1	LTR	FR	0.942
Chr18	10345856	10346356	Kaskaskia	RLG1	LTR	FR	1000
Chr18	10470898	10471398	Villersexel	RLG1	LTR	FR	1000
Chr18	10993673	10994173	Villersexel	RLG1	LTR	F	1000
Chr18	12229715	12230215	Reute	RLG1	LTR	R	0.990
Chr18	12229731	12230231	Kaskaskia	RLG1	LTR	R	1000
Chr18	12449518	12450018	Villersexel	RLG1	LTR	FR	1000
Chr18	13289686	13290186	Villersexel	RLG3	LTR	FR	0.859
Chr18	14271174	14271674	Villersexel	RLG1	LTR	F	1000
Chr18	14517234	14517734	Kaskaskia	RLG1	LTR	R	1000
Chr18	15716339	15716839	Villersexel	RLG1	LTR	FR	0.858
Chr19	63885	64385	Villersexel	RLG1	LTR	F	1000
Chr19	1173366	1173866	Villersexel	RLG1	LTR	FR	1000
Chr19	1300399	1300899	Kaskaskia	RLG1	LTR	R	1000
Chr19	1833113	1833613	Kaskaskia	RLG3	LTR	R	1000
Chr19	2156117	2156617	Kaskaskia	RLG1	LTR	R	1000
Chr19	2201462	2201962	Villersexel	RLG3	LTR	FR	0.959
Chr19	3277199	3277699	Villersexel	RLG1	LTR	FR	0.998
Chr19	4038300	4038800	Kaskaskia	RLG1	LTR	FR	1000
Chr19	4710402	4710902	Villersexel	RLG1	LTR	F	0.702
Chr19	5074502	5075002	Kaskaskia	RLG1	LTR	FR	1000
Chr19	5417667	5418167	Kaskaskia	RLC5	LTR	FR	1000
Chr19	5624304	5624804	Villersexel	RLG1	LTR	F	0.986
Chr19	5624336	5624836	Kaskaskia	RLG1	LTR	F	1000
Chr19	6144297	6144797	Villersexel	RLG1	LTR	FR	1000
Chr19	7377745	7378245	Reute	RLG1	LTR	R	1000
Chr19	7427041	7427541	Villersexel	RLG1	LTR	FR	1000
Chr19	7588480	7588980	Villersexel	RLG1	LTR	R	1000
Chr19	7807967	7808467	Villersexel	RLG3	LTR	F	1000
Chr19	7842813	7843313	Reute	RLG1	LTR	FR	0.932
Chr19	8038379	8038879	Villersexel	RLG1	LTR	R	1000
Chr19	9311424	9311924	Villersexel	RLG1	LTR	R	0.987
Chr19	10992852	10993352	Villersexel	RLG1	LTR	FR	1000
Chr19	11127547	11128047	Kaskaskia	RLG1	LTR	R	1000
Chr19	11336048	11336548	Villersexel	RLC5	LTR	FR	0.998
Chr19	11674713	11675213	Kaskaskia	RLG1	LTR	FR	1000
Chr19	12350984	12351484	Villersexel	RLG1	LTR	FR	1000
Chr19	14205491	14205991	Kaskaskia	RLG1	LTR	FR	1000
Chr20	1148990	1149490	Kaskaskia	RLG1	LTR	R	0.938
Chr20	1558482	1558982	Villersexel	RLG1	LTR	F	0.975
Chr20	2218575	2219075	Kaskaskia	RLG1	LTR	FR	1000
Chr20	3274150	3274650	Villersexel	RLG1	LTR	R	1000
Chr20	5973572	5974072	Kaskaskia	RLG3	LTR	F	1000
Chr20	5982159	5982659	Villersexel	RLG1	LTR	FR	0.973
Chr20	8859656	8860156	Villersexel	RLG1	LTR	FR	0.999
Chr20	10359895	10360395	Kaskaskia	RLG1	LTR	R	1000
Chr20	10599760	10600260	Villersexel	RLG1	LTR	FR	0.979
Chr20	10763293	10763793	Kaskaskia	RLG1	LTR	R	1000
Chr20	12983299	12983799	Villersexel	RLG1	LTR	FR	0.962
Chr20	14912741	14913241	Villersexel	RLC5	LTR	FR	0.998
Chr21	1653008	1653508	Villersexel	RLG1	LTR	FR	0.998
Chr21	2034781	2035281	Villersexel	RLG1	LTR	FR	0.994
Chr21	2038734	2039234	Kaskaskia	RLG1	LTR	F	1000
Chr21	3233861	3234361	Villersexel	RLG3	LTR	FR	0.937
Chr21	3555042	3555542	Reute	RLG1	LTR	FR	1000
Chr21	5233010	5233510	Kaskaskia	RLG1	LTR	F	1000
Chr21	5233898	5234398	Kaskaskia	RLG1	LTR	R	1000
Chr21	5706809	5707309	Villersexel	RLG1	LTR	F	0.994
Chr21	6921066	6921566	Villersexel	RLG1	LTR	F	0.951
Chr21	6997671	6998171	Villersexel	RLG1	LTR	FR	1000
Chr21	7224641	7225141	Kaskaskia	RLG1	LTR	FR	1000
Chr21	10286457	10286957	Reute	RLG1	LTR	FR	0.754
Chr21	12669504	12670004	Villersexel	RLG3	LTR	F	1000
Chr21	13137748	13138248	Kaskaskia	RLG1	LTR	F	1000
Chr22	364884	365384	Kaskaskia	RLG1	LTR	FR	1000
Chr22	1305750	1306250	Kaskaskia	RLG1	LTR	FR	1000
Chr22	1684299	1684799	Villersexel	RLC5	LTR	FR	0.912
Chr22	4520254	4520754	Kaskaskia	RLG3	LTR	FR	1000
Chr22	4699253	4699753	Villersexel	RLG1	LTR	FR	0.998
Chr22	5358925	5359425	Villersexel	RLG1	LTR	R	0.815
Chr22	5919473	5919973	Villersexel	RLG1	LTR	F	0.987
Chr22	9349088	9349588	Villersexel	RLG1	LTR	FR	0.977
Chr22	11634260	11634760	Kaskaskia	RLC5	LTR	R	1000
Chr22	12126324	12126824	Kaskaskia	RLC5	LTR	FR	1000
Chr22	12657419	12657919	Kaskaskia	RLG3	LTR	R	1000
Chr22	13862707	13863207	Kaskaskia	RLG1	LTR	F	1000
Chr22	13880708	13881208	Kaskaskia	RLC5	LTR	FR	1000
Chr22	13915420	13915920	Villersexel	RLG1	LTR	FR	1000
Chr22	14232171	14232671	Villersexel	RLG1	LTR	FR	0.983
Chr22	14782521	14783021	Kaskaskia	RLG3	LTR	F	1000
Chr22	15040586	15041086	Villersexel	RLG1	LTR	F	0.841
Chr23	463416	463916	Villersexel	RLC5	LTR	F	0.741
Chr23	463436	463936	Villersexel	RLC5	LTR	FR	0.705
Chr23	2609707	2610207	Villersexel	RLG3	LTR	R	1000
Chr23	3962918	3963418	Kaskaskia	RLG1	LTR	F	1000
Chr23	5120655	5121155	Reute	RLC5	LTR	FR	0.964
Chr23	6512730	6513230	Villersexel	RLG1	LTR	FR	0.986
Chr23	6994276	6994776	Villersexel	RLG1	LTR	R	1000
Chr23	8356585	8357085	Villersexel	RLG3	LTR	FR	0.853
Chr23	8771317	8771817	Kaskaskia	RLG1	LTR	R	1000
Chr23	8848975	8849475	Villersexel	RLG1	LTR	R	1000
Chr23	9407106	9407606	Villersexel	RLG1	LTR	R	0.828
Chr23	10899491	10899991	Reute	RLG1	LTR	FR	0.921
Chr23	13263732	13264232	Villersexel	RLG3	LTR	FR	0.957
Chr23	13263736	13264236	Kaskaskia	RLG3	LTR	FR	0.895
Chr23	14945870	14946370	Villersexel	RLG3	LTR	R	0.900
Chr24	80417	80917	Villersexel	RLG1	LTR	FR	1000
Chr24	725118	725618	Reute	RLG1	LTR	F	1000
Chr24	1027369	1027869	Villersexel	RLG1	LTR	F	1000
Chr24	3362372	3362872	Villersexel	RLG1	LTR	FR	0.979
Chr24	3937148	3937648	Villersexel	RLG3	LTR	F	1000
Chr24	7776465	7776965	Kaskaskia	RLG1	LTR	F	1000
Chr24	7799620	7800120	Villersexel	RLG1	LTR	R	0.996
Chr24	7965261	7965761	Kaskaskia	RLG1	LTR	F	1000
Chr24	8254361	8254861	Kaskaskia	RLG1	LTR	F	1000
Chr24	8315025	8315525	Villersexel	RLG1	LTR	FR	1000
Chr24	8429465	8429965	Villersexel	RLC5	LTR	FR	0.966
Chr24	9015246	9015746	Villersexel	RLG1	LTR	F	0.891
Chr24	9512410	9512910	Villersexel	RLG3	LTR	R	0.912
Chr24	9678405	9678905	Villersexel	RLG1	LTR	F	1000
Chr24	11529372	11529872	Villersexel	RLG1	LTR	R	0.969
Chr24	12017850	12018350	Villersexel	RLG1	LTR	FR	1000
Chr24	12066203	12066703	Kaskaskia	RLG1	LTR	F	1000
Chr24	12837437	12837937	Kaskaskia	RLG1	LTR	R	1000
Chr25	45857	46357	Villersexel	RLG1	LTR	FR	0.992
Chr25	733340	733840	Villersexel	RLG1	LTR	FR	0.986
Chr25	1707012	1707512	Villersexel	RLG1	LTR	FR	0.974
Chr25	1743500	1744000	Villersexel	RLG1	LTR	R	0.976
Chr25	3036507	3037007	Villersexel	RLG2	LTR	FR	0.963
Chr25	4469834	4470334	Villersexel	RLG1	LTR	FR	0.990
Chr25	4682258	4682758	Villersexel	RLG1	LTR	F	0.948
Chr25	5840979	5841479	Villersexel	RLG1	LTR	FR	0.989
Chr25	6965680	6966180	Kaskaskia	RLC5	LTR	FR	1000
Chr25	8899472	8899972	Villersexel	RLG3	LTR	F	0.913
Chr25	9120046	9120546	Kaskaskia	RLG1	LTR	F	1000
Chr25	10947671	10948171	Kaskaskia	RLG1	LTR	F	1000
Chr26	424794	425294	Villersexel	RLG3	LTR	F	0.992
Chr26	919182	919682	Villersexel	RLG1	LTR	F	1000
Chr26	3025776	3026276	Reute	RLG1	LTR	F	0.716
Chr26	4064394	4064894	Kaskaskia	RLC5	LTR	FR	1000
Chr26	5050612	5051112	Villersexel	RLG1	LTR	F	0.989
Chr26	5787718	5788218	Villersexel	RLC5	LTR	FR	1000
Chr26	6259338	6259838	Villersexel	RLG1	LTR	F	0.984
Chr26	6269091	6269591	Villersexel	RLG1	LTR	R	0.924
Chr26	6581976	6582476	Kaskaskia	RLG1	LTR	R	1000
Chr26	8399524	8400024	Kaskaskia	RLG1	LTR	F	0.865
Chr26	8527199	8527699	Villersexel	RLG1	LTR	FR	0.985
Chr26	8800128	8800628	Villersexel	RLG1	LTR	R	1000
Chr26	9124668	9125168	Villersexel	RLG1	LTR	FR	0.998
Chr26	9502649	9503149	Reute	RLG1	LTR	R	0.982
Chr26	9506138	9506638	Villersexel	RLG1	LTR	R	1000
Chr26	9817304	9817804	Kaskaskia	RLG1	LTR	F	1000
Chr26	9840003	9840503	Kaskaskia	RLG1	LTR	FR	1000
Chr26	9991715	9992215	Villersexel	RLG1	LTR	FR	0.972
Chr27	55336	55836	Villersexel	RLG1	LTR	FR	0.980
Chr27	1169092	1169592	Villersexel	RLG1	LTR	FR	0.935
Chr27	1678605	1679105	Kaskaskia	RLG1	LTR	F	1000
Chr27	4059925	4060425	Kaskaskia	RLG1	LTR	FR	1000
